# Supplementary material for: Hydrogen spillover and its relation to catalysis: observations on structurally defined single-atom sites
Source: Research Square preprint supplement (doi:10.21203/rs.3.rs-574294/v1), 2021-06-08
Supplement: Supplementary file 1 [file fcdacdc9178240b85cbf6f49.docx]

Supporting Information for

Hydrogen spillover and its relation to catalysis: observations on structurally defined single-atom sites

Max J. Hülsey,1,3 Victor Fung,2,3 Ning Yan1,*

1 Department of Chemical and Biomolecular Engineering, National University of Singapore, 117585 Singapore.

2 Center for Nanophase Materials Sciences, Oak Ridge National Laboratory, Oak Ridge, Tennessee 37831, United States of America.

3 These authors contributed equally: Max J. Hülsey, Victor Fung.

* Corresponding author. Email: [ning.yan@nus.edu.sg](mailto:ning.yan@nus.edu.sg)

**Supplementary Fig. 1 | ESI-MS for PMo12O403- and PMo11O397-.** Reaction conditions: Vtotal = 0.02 L deionised water with CPOM = 1 mM. PMo11O397- was freshly synthesised just before the analysis.

**Supplementary Fig. 2 | Experimental and simulated spectra of different hydrogen spillover species.** Experimental spectra were recorded from PMo11O39Pd1 after 5 (**a**, **b**) and 60 min (**c**, **d**) H2 treatment together with the overlapped simulated spectra for **a**, **c** {[PMo11O39Pd1–Hx] + 3H+}2-, and **b**, **d** {[PMo11O39Pd1–H16] + 3H+}2-. Reaction conditions: Vtotal = 0.02 L deionised water with CPMo11O39 = 1 mM, CPd = 0.5 mM, F (5% H2/N2) = 40 cm3 min-1, T = RT.

**Supplementary Fig 3 | 1H NMR of PMo11O39Pd1 before and after H2 exposure.** Reaction conditions: Vtotal = 0.002 L dimethyl sulfoxide-d6 with CPMo11O39 = 10 mM, CPd = 5 mM, F (5% H2/N2) = 40 cm3 min-1, t = 0-24 h, T = RT. Conditions are the same as in Fig. 1d but the whole range between 0-10 ppm is shown.

**Supplementary Fig. 4 | Fragmentation of {[PMo11O39Pd1–H16] + 3H+}2-.** Reaction conditions: Vtotal = 0.02 L deionised water with CPMo11O39 = 1 mM, CPd = 0.5 mM, F (5% H2/N2) = 40 cm3 min-1, t = 30 min, T = RT, Efrag = 15 eV.

**Supplementary Fig. 5 | Reversibility of the hydrogen spillover phenomenon.** Photos of aliquots of PMo11O39Pd1-containing solutions after H2 spillover for 180 mins and the same tubes after 12 h under ambient conditions. Hydrogen spillover over PMo11O39Pd1 appears to be a reversible process but the spillover reversal is slower than the initial forward step of hydrogen spillover.





**Supplementary Fig 6 |****Hydrogen spillover thermodynamics on PMo11O39Pd1.**

**Supplementary Text**

Our findings suggest that metal-POM combinations other than with PMo11O39Pd1 do not show hydrogen spillover while the precise catalyst:H ratios after hydrogen spillover are determined based on ESI-MS and 1H NMR. When comparing the H2 splitting barriers between four different common Keggin-derived lacunary POMs (PMo11O39Pd1, SiMo11O39Pd1, PW11O39Pd1, and SiW11o39Pd1), only minimal differences are predicted by DFT (Supplementary Fig. 7). This suggests that while W-based POMs support the heterolytic cleavage of H2, no hydrogen spillover occurs based on our experimental observations.

The reason why Pd seems to be unique in its hydrogen spillover behaviour on our POM-based SAC remains elusive to us. Possible reasons range from differences in the electronic coupling between the metal ions and the POM affecting the electron transfer kinetics to differences in the metal-dependent local geometry changes during hydrogen activation and spillover.

**Supplementary Fig. 7 | Hydrogen splitting on different POM-based Pd SACs. a**, DFT calculated structures of intermediates and transition states during H2 splitting and spillover. Colour code – grey: Pd, light blue: Mo, pink: P, red: O, white: H. **b**, Reaction energies during the hydrogen splitting and spillover process on different POM-based Pd SACs. Composition of the different catalyst structures: MoP = PMo11O39Pd1; MoSi = SiMo11O39Pd1; WP = PW11O39Pd1, WSi = SiW11O39Pd1.

**Supplementary Table 1 | Activation energies for the H­2 dissociation on different Pd-based SACs.**

| POM | PMo11O39Pd1 | SiMo11O39Pd1 | PW­11­O­39Pd1 | SiW11O39Pd1 |
| --- | --- | --- | --- | --- |
| Ea (eV) | 0.40 | 0.32 | 0.43 | 0.38 |

**Supplementary Fig. 8 | Reactivity between hydrogen spilled over PMo11O39Pd1 and NP.** ESI-MS spectra of PMo11O39Pd1 after hydrogen spillover for 120 min (black) and after an additional 30 min reaction with nitrophenol (orange, without H2 flow). Reaction conditions: Vtotal = 0.02 L deionised water with CPMo11O39 = 1 mM, CPd = 0.5 mM, F (5% H2/N2) = 40 cm3 min-1, Csubstrate = 25 mM added after 120 min H2 spillover, T = RT. The observation of catalyst structures with low H coverage in the absence of H2 in the ionisation chamber further confirm that they are observable by ESI-MS but appear to be unstable intermediates during the hydrogen spillover process.

**Supplementary Fig. 9| Experimental and simulated spectra of PMo11O39Pd1 after hydrogen spillover during the NP hydrogenation.** Experimental spectra obtained from Supplementary Fig. 8. For the simulations, the following two species were considered: {[PMo11O39Pd1–H4] + 3H+}2- and {[PMo11O38Pd1–H2] + 3H+}2-.

**Supplementary Fig. 10 | Effect of local H coverage on ACP hydrogenation barriers.** Reaction energies of the proton transfer step between the catalyst and ACP for **a**, a higher and **b**, a lower local H coverage. Colour code – grey: Pd, light blue: Mo, pink: P, red: O, white: H.

**Supplementary Table 2 | Energetics of the oxygen vacancy formation at different H coverages on PMo11O39Pd1.**

|  | O | H2O |
| --- | --- | --- |
| 0H | 1.90 | -- |
| 4H | 2.68 | 0.31 |
| 14H | 3.78 | -0.14 |
| 16H | 3.95 | -0.15 |

**Supplementary Fig. 11 | Reaction energies of ACP hydrodeoxygenation over PMo11O39Pd1–H14. a**, Intermediates and transition states of the ACP hydrodeoxygenation and **b**, the corresponding DFT calculated reaction coordinate. Colour code – grey: Pd, light blue: Mo, pink: P, red: O, white: H.

**Supplementary methods**

**Catalyst characterisation**

ESI-MS analyses were performed on a Bruker MicroTOF-Q system with a liquid flow rate of 180 μL h-1 delivered by a Hamilton gas tight syringe in a kd Scientific syringe pump. The ESI-MS source was operated with an end plate offset of 500 V, a capillary potential of 3.8 kV, a nebuliser gas (N2) pressure of 0.4 bar with a drying gas (N2) flow of 4 L min-1 at a temperature of 200 °C. Analyses were performed in the negative mode with data accumulation for 1 min with a sampling frequency of 1 Hz in the range of 500-2000. Typically, catalyst concentrations did not exceed 1 mmol L-1. Multiple reaction monitoring (MRM) was used for the MS/MS analysis of samples entailing the collision of mass-selected ion species in the gas phase with precisely tuned energised Ar atoms. Sodium formate solutions were used for external calibrations while the ubiquitous peaks for {PW11O397- + 3H+ + Na+}3- and {PMo11O397- + 5H+}2- with the highest intensity peaks at m/z 900.75 and 856.89, respectively. The mass resolution is approximately 10,000 with residual m/z errors below 0.05 and full width at half maximum values of around 0.1. Between measurements, the syringe, tubing, and ESI-MS needle were cleaned with deionised water until the intensity of the residual peaks was below ~100 while intensities of relevant signals during measurements are in the range of 104 to 105. Samples for kinetic experiments were injected within one minute to avoid changes in the catalyst structure between reaction and analysis.

UV-Vis spectra were recorded using a JASCO V530 spectrometer. Samples were diluted by a factor of 30 and then analysed with deionised water as reference sample. 1H NMR spectra were recorded in d6-DMSO (Sigma Aldrich) on a Bruker Avance 400 spectrometer. All resonances are referenced to the residual protonated DMSO resonance (δ = 2.50 ppm). All spectra were recorded at room temperature.

Hydrogen spillover kinetics were measured for the initial first 30-60 minutes when the formation of the final PMo11O­39Pd­­1–H16 intermediate (and the subsequent oxygen vacant species) was almost negligible. Concentrations of the hydrogen spillover intermediates were estimated by ESI-MS at specific time points and related to the UV-Vis absorbance at 700 nm.

Hydrogenation reaction rates were calculated based on the total amount of Pd present in solution from the following equation:
